# Supplementary material for: The Effect of Diet on the Cardiac Circadian Clock in Mice: A Systematic Review
Source: MDPI journal article supplement (doi:10.3390/metabo12121273), 2022-12-15
Supplement: s1 [file s1]

(a)

|                        | Random sequence generation (selection bias) | Baseline characteristics (selection bias) | Allocation concealment (selection bias) | Random housing (performance bias) | Blinding of participants and personnel (performance bias) | Random outcome assessment (detection bias) | Blinding of outcome assessment (detection bias) | Incomplete outcome data (attrition bias) | Selective reporting (reporting bias) | Other bias |
|------------------------|---------------------------------------------|-------------------------------------------|-----------------------------------------|-----------------------------------|-----------------------------------------------------------|--------------------------------------------|-------------------------------------------------|------------------------------------------|--------------------------------------|------------|
| Bray et al. (2013)     | +                                           | ?                                         | ?                                       | ?                                 | ?                                                         | +                                          | +                                               | +                                        | +                                    | +          |
| Goh et al. (2007)      | +                                           | ?                                         | +                                       | +                                 | ?                                                         | +                                          | +                                               | ?                                        | +                                    | ?          |
| Hou et al. (2009)      | +                                           | ?                                         | ?                                       | +                                 | +                                                         | +                                          | +                                               | ?                                        | +                                    | ?          |
| Latimer et al. (2021)  | +                                           | ?                                         | +                                       | ?                                 | ?                                                         | +                                          | +                                               | +                                        | +                                    | ?          |
| Marques et al. (2017)  | +                                           | ?                                         | ?                                       | +                                 | +                                                         | +                                          | ?                                               | ?                                        | +                                    | ?          |
| Mia et al. (2021)      | +                                           | ?                                         | +                                       | ?                                 | ?                                                         | +                                          | +                                               | ?                                        | +                                    | +          |
| Mukherji et al. (2015) | +                                           | ?                                         | +                                       | +                                 | +                                                         | +                                          | +                                               | ?                                        | +                                    | +          |
| Murata et al. (2021)   | +                                           | ?                                         | +                                       | +                                 | +                                                         | ?                                          | +                                               | ?                                        | +                                    | ?          |
| Noguchi et al. (2018)  | +                                           | ?                                         | ?                                       | +                                 | +                                                         | +                                          | +                                               | ?                                        | +                                    | ?          |
| Noyan et al. (2015)    | +                                           | ?                                         | ?                                       | ?                                 | +                                                         | +                                          | +                                               | +                                        | +                                    | ?          |
| Oishi et al. (2009)a   | +                                           | ?                                         | +                                       | +                                 | +                                                         | +                                          | +                                               | ?                                        | +                                    | ?          |
| Oishi et al. (2009)b   | +                                           | ?                                         | +                                       | +                                 | +                                                         | +                                          | +                                               | ?                                        | +                                    | ?          |
| Oishi et al. (2010)    | +                                           | ?                                         | +                                       | +                                 | +                                                         | +                                          | +                                               | ?                                        | +                                    | +          |
| Oishi et al. (2017)    | +                                           | ?                                         | +                                       | +                                 | +                                                         | +                                          | +                                               | ?                                        | +                                    | ?          |
| Reilly et al. (2008)   | +                                           | ?                                         | +                                       | +                                 | +                                                         | +                                          | +                                               | ?                                        | +                                    | +          |
| Reitz et al. (2020)    | +                                           | ?                                         | +                                       | ?                                 | ?                                                         | +                                          | +                                               | +                                        | +                                    | ?          |
| Tsai et al. (2010)     | +                                           | ?                                         | ?                                       | +                                 | +                                                         | +                                          | +                                               | ?                                        | +                                    | ?          |
| Wang et al. (2015)     | +                                           | ?                                         | ?                                       | +                                 | +                                                         | ?                                          | +                                               | +                                        | +                                    | ?          |
| Xin et al. (2021)      | +                                           | ?                                         | ?                                       | +                                 | +                                                         | +                                          | +                                               | +                                        | +                                    | ?          |

(b)

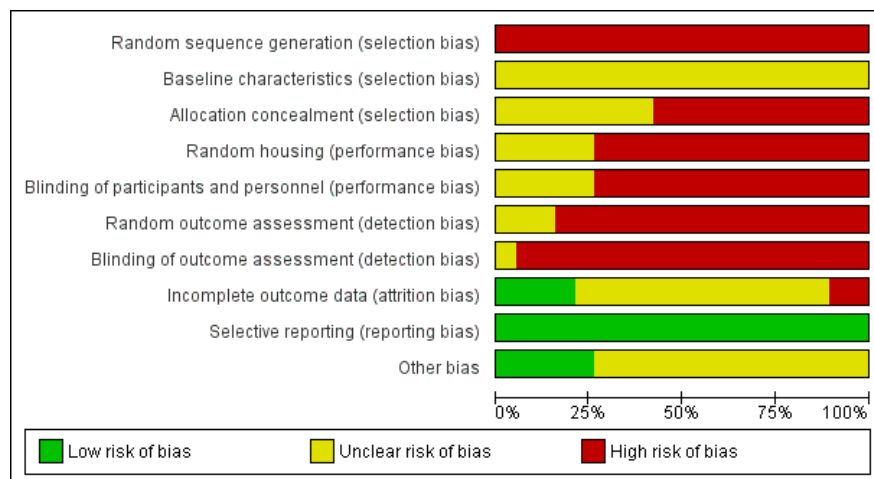

**Figure S1.** Result of the assessment of the risk of bias of the studies included in the systematic review. (a) summary of the risk of bias; (b) risk of bias graph.
