# Supplementary material for: The Effect of Diet on the Cardiac Circadian Clock in Mice: A Systematic Review
Source: MDPI journal article supplement (doi:10.3390/metabo12121273), 2022-12-15
Supplement: s1 [file s1]

## SUPPLEMENTARY MATERIALS

**Table S1.** Diets and its effects on the circadian clock.

| <b>Dietary Interventions/Diet</b> | <b>Studies</b> | <b>Conclusion</b>                                                                                                                                                                                                                                                                                                                                                                                                                                                                                                                             |
|-----------------------------------|----------------|-----------------------------------------------------------------------------------------------------------------------------------------------------------------------------------------------------------------------------------------------------------------------------------------------------------------------------------------------------------------------------------------------------------------------------------------------------------------------------------------------------------------------------------------------|
| <b>Restricted feeding</b>         | 18–23          | Light phase: desynchronization between metabolically active tissues;<br>Dark phase: increased caloric intake, reduced energy expenditure, and dependence on fatty acid oxidation;<br>RF: Modulator of peripheral circadian oscillators, its effect on circadian rhythms is sex-dependent.                                                                                                                                                                                                                                                     |
| <b>High-fat diet</b>              | 24,26–31       | Affected the peripheral circadian clocks;<br>RF with HFD in the dark phase: restores changes in lipid metabolism and cardiac remodeling;<br>The end of the active phase: myocardial steatosis, increased triglycerides synthesis;<br>Absent model CLOCK: Protective effect for cardiovascular diseases;<br>During pregnancy and lactation: affect the expression of clock genes, metabolism genes, inflammatory pathways;<br>RF with HFD: effect of endogenous insulin dependent in the feeding cycle on the regulation of peripheral clocks. |
| <b>Ketogenic diet</b>             | 25,32          | Phase advance on clock genes, hypoglycemia, increased FFA and ketone body levels.                                                                                                                                                                                                                                                                                                                                                                                                                                                             |
| <b>Others diets</b>               | 33–36          | Time of day of BCAA intake influences cardiac parameters;<br>Fiber dietary fiber and acetate act as a ZT;<br>Biotin-rich diet induced protein biotinylation;<br>Condition of hypophosphatemia increased levels of clock genes.                                                                                                                                                                                                                                                                                                                |

Legend: RF, restricted feeding; HFD, high-fat diet; FFA, free fatty acid; BCAA, branched-chain amino acids; ZT, zeitgeber time.
